# Supplementary material for: Facile conversion of plant oil (anethole) to a high-performance material
Source: Royal Society of Chemistry journal article supplement (doi:10.1039/c7py00047b), 2017-01-01
Supplement: c7py00047b1.pdf [file c7py00047b1.pdf]

Electronic Supplementary Information for

## “Facile conversion of plant oil (anethole) to a high-performance material”

Yangqing Tao, Fengkai He, Kaikai Jin, Jijia Wang, Yuanqiang Wang, Junfeng Zhou, Jing Sun\* and Qiang Fang\*

Key Laboratory of Synthetic and Self-Assembly Chemistry for Organic Functional Molecules, Shanghai Institute of Organic Chemistry, Chinese Academy of Sciences, 345 Lingling Road, Shanghai 200032, PR China.

### 1. Synthesis of M1

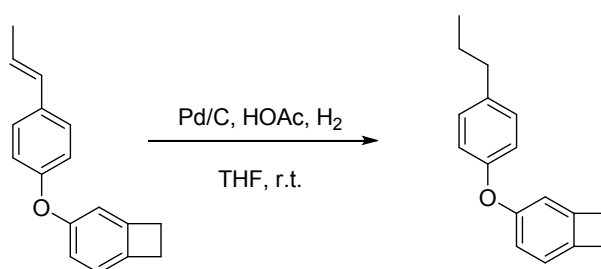

A mixture of M-BCB (2.00 g, 8.46 mmol), Pd/C (10 %) (1.80 g, 1.69 mmol), HOAc (1.02 g, 16.93 mmol), THF (10 ml) were added to a 25 ml flask equipped with a magnetic stirrer, then the mixture was kept at room temperature for 24 h under H<sub>2</sub> atmosphere. M1 was obtained as a colorless liquid with a yield of 96 % by column chromatograph using petroleum ether as the eluent. <sup>1</sup>H NMR (400 MHz, CDCl<sub>3</sub>): δ = 7.13 – 7.07 (m, 2H), 6.98 (d, *J* = 7.9 Hz, 1H), 6.92 – 6.86 (m, 2H), 6.87 – 6.81 (m, 1H), 6.74 (t, *J* = 5.6 Hz, 1H), 3.13 (d, *J* = 3.8 Hz, 4H), 2.57 – 2.52 (m, 2H), 1.67 – 1.57 (m, 2H), 0.94 (t, *J* = 7.4 Hz, 3H). <sup>13</sup>C NMR (101 MHz, CDCl<sub>3</sub>): δ = 156.9, 156.1, 146.8, 140.3, 137.2, 129.6 (2C), 123.9, 118.4 (3C), 114.3, 37.4, 29.2, 29.0, 24.9, 13.9. HRMS-EI(*m/z*): Calcd. C<sub>17</sub>H<sub>18</sub>O [M]<sup>+</sup> 238.1358; Found 238.1364. Anal. Calcd. C<sub>17</sub>H<sub>18</sub>O: C, 85.67; H, 7.61; Found: C, 85.58; H, 7.53.

### 2. Complementary data

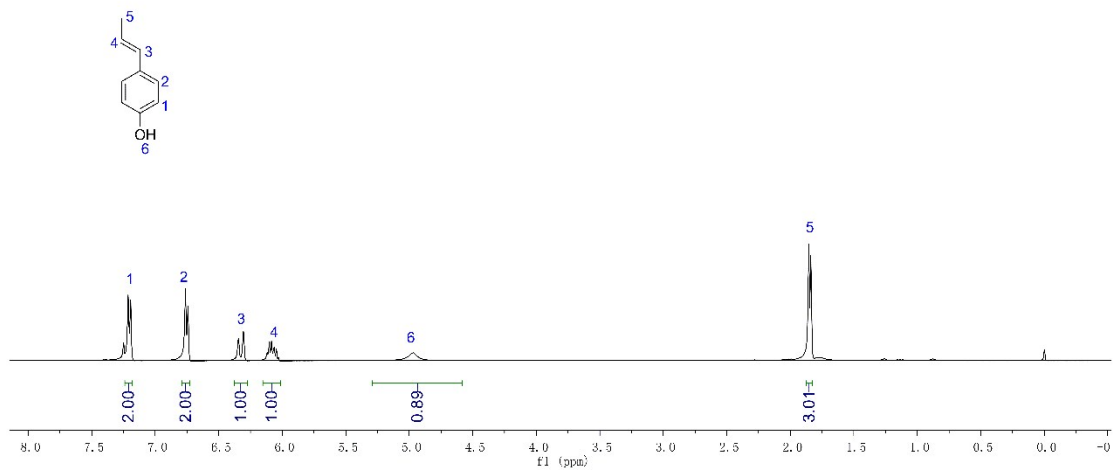

Fig. S1 <sup>1</sup>H NMR of B (400 MHz, CDCl<sub>3</sub>)

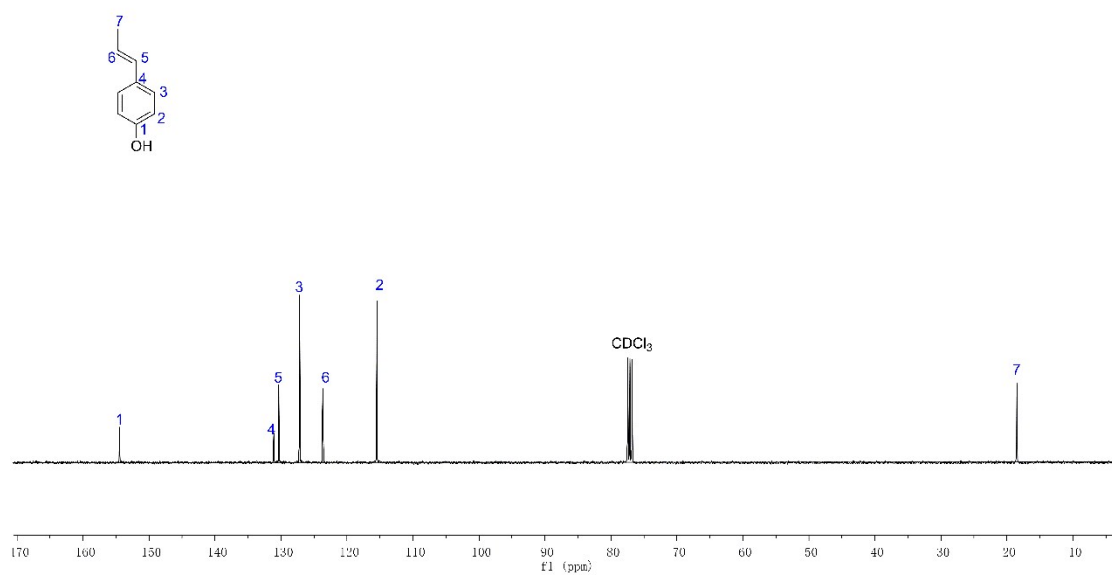

Fig. S2 <sup>13</sup>C NMR spectrum of B (400 MHz, CDCl<sub>3</sub>)

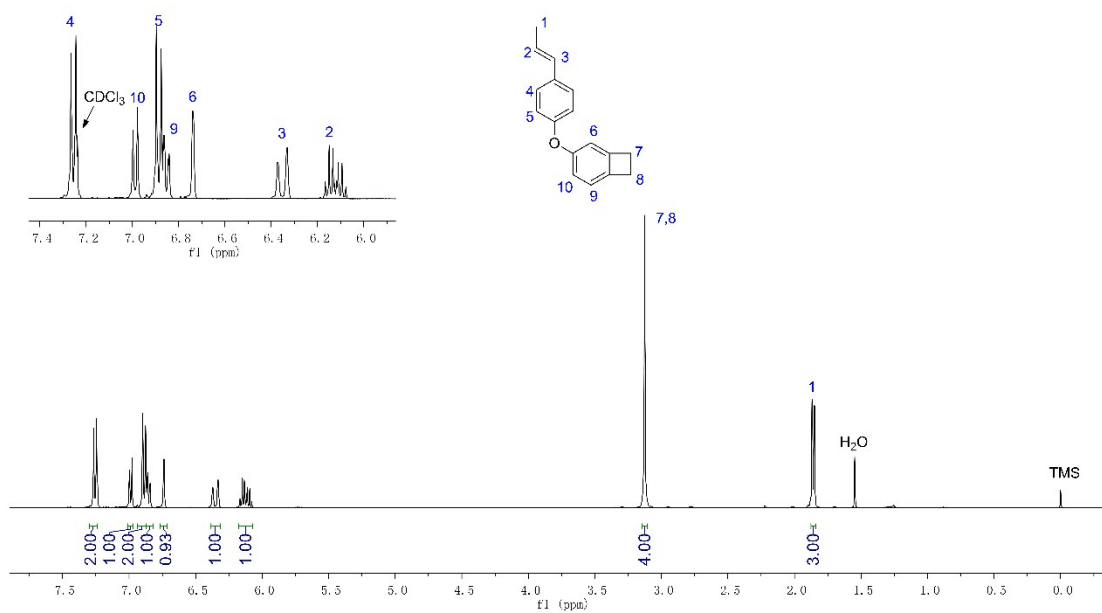

**Fig. S3**  $^1\text{H}$  NMR of M-BCB (400 MHz,  $\text{CDCl}_3$ )

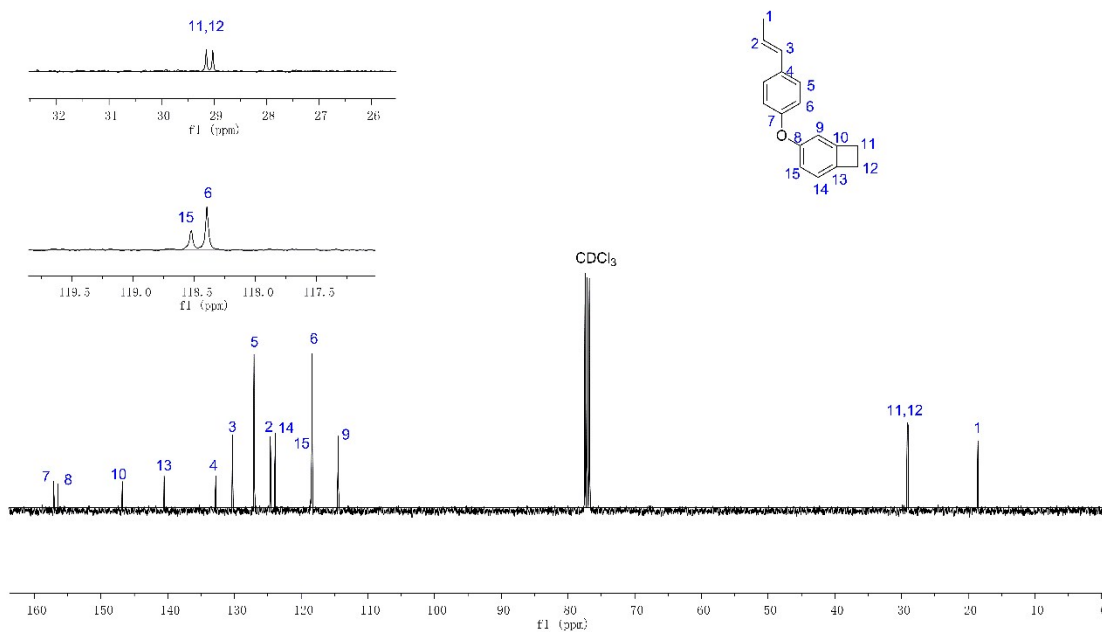

**Fig. S4**  $^{13}\text{C}$  NMR spectrum of M-BCB (400 MHz,  $\text{CDCl}_3$ )

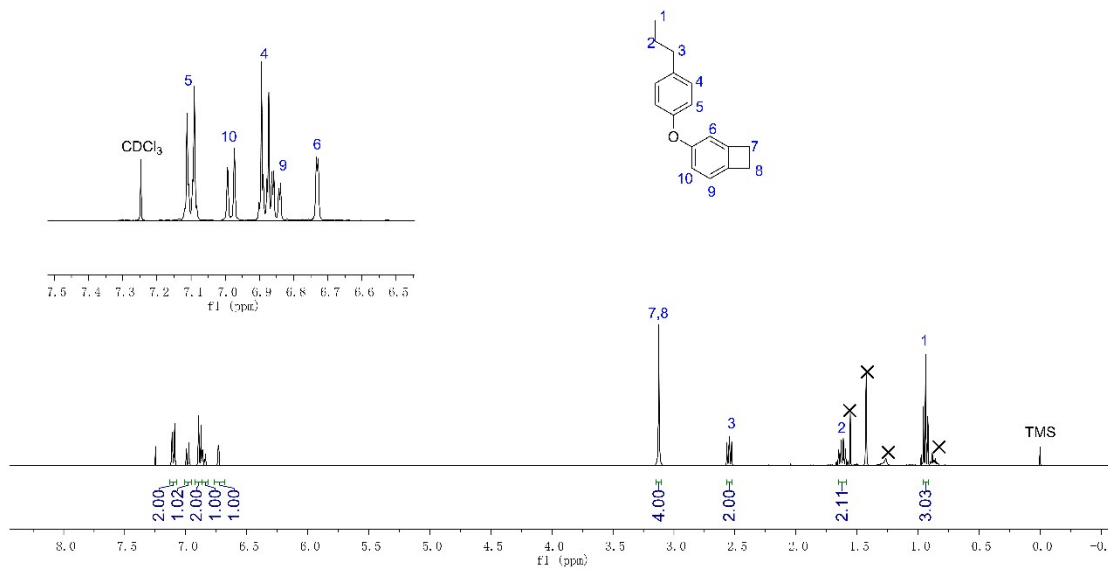

**Fig. S5**  $^1\text{H}$  NMR spectrum of M1 (400 MHz,  $\text{CDCl}_3$ )

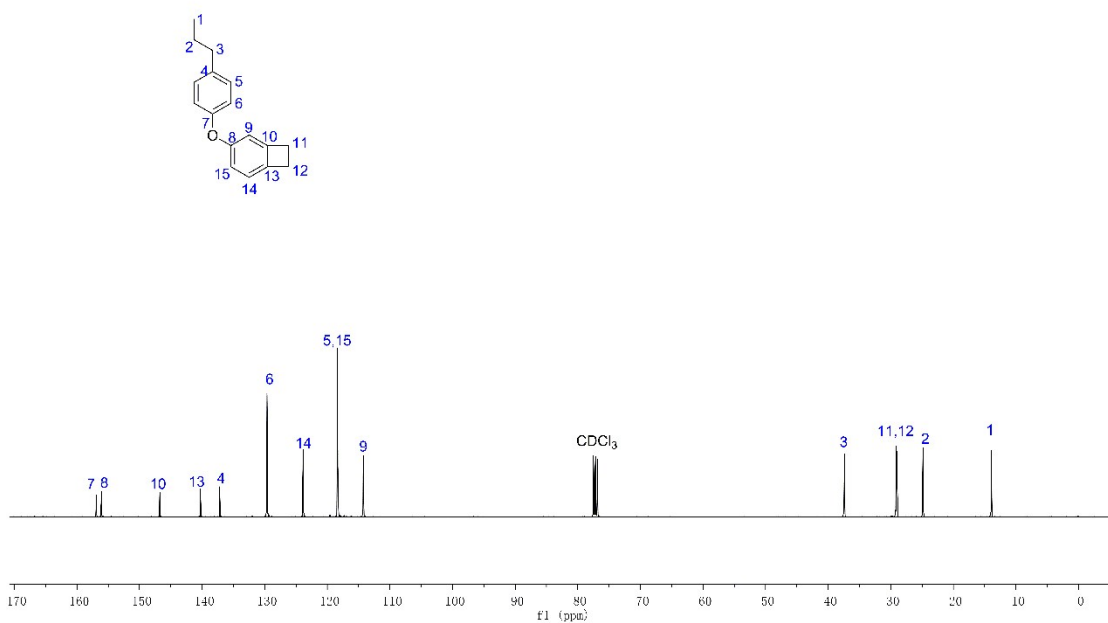

**Fig. S6**  $^{13}\text{C}$  NMR spectrum of M1 (400 MHz,  $\text{CDCl}_3$ )

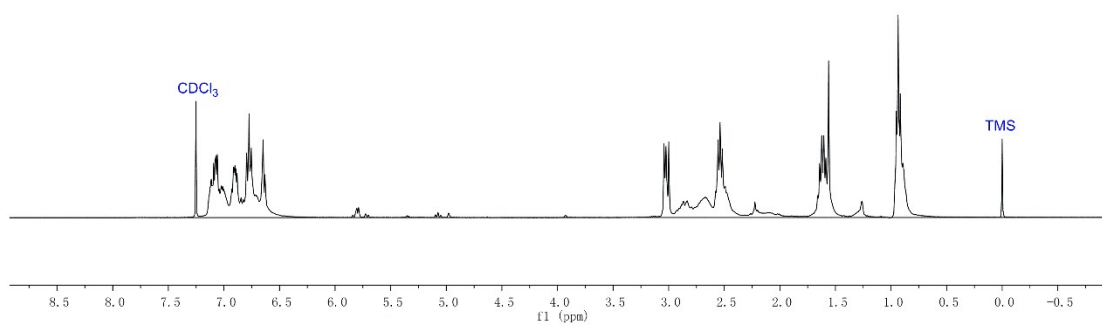

**Fig. S7**  $^1\text{H}$  NMR spectrum of **PM1** (400 MHz,  $\text{CDCl}_3$ )

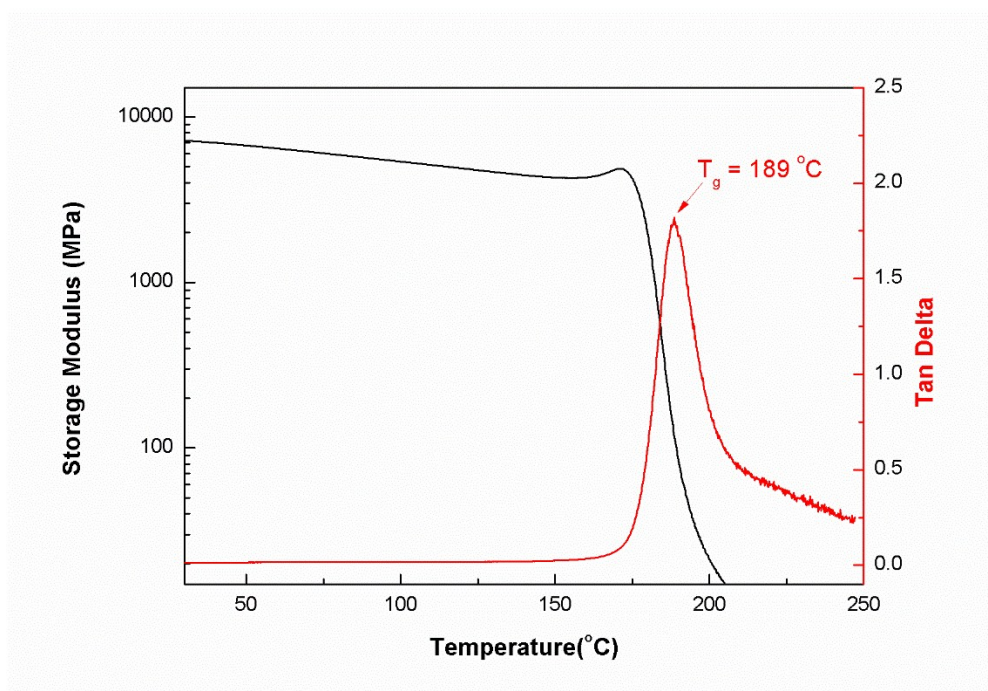

**Fig. S8** DMA curves of **PM-BCB**

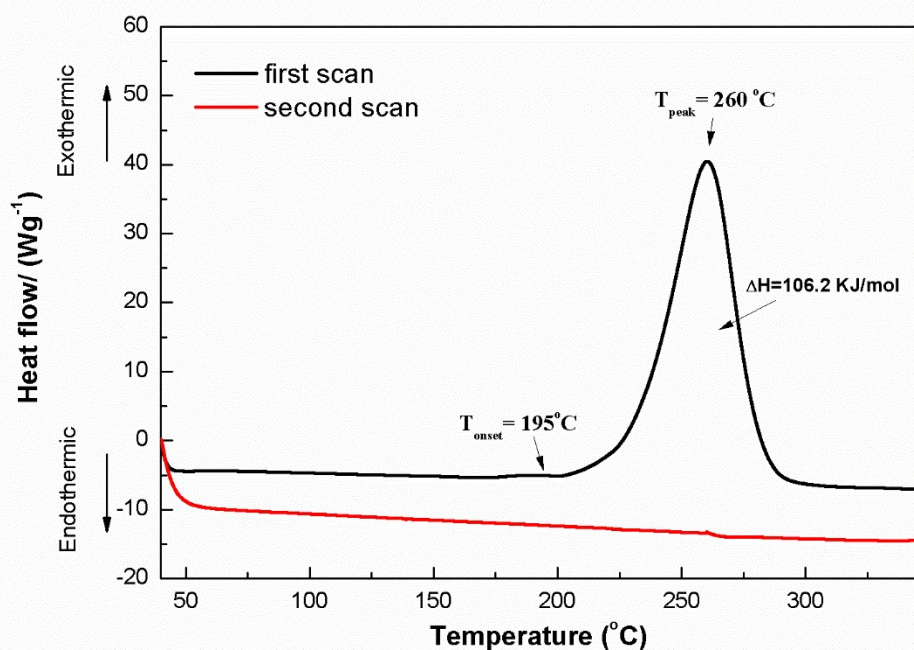

**Fig. S9** DSC curves of M-BCB at a heating rate of  $10^{\circ}\text{C}/\text{min}^{-1}$

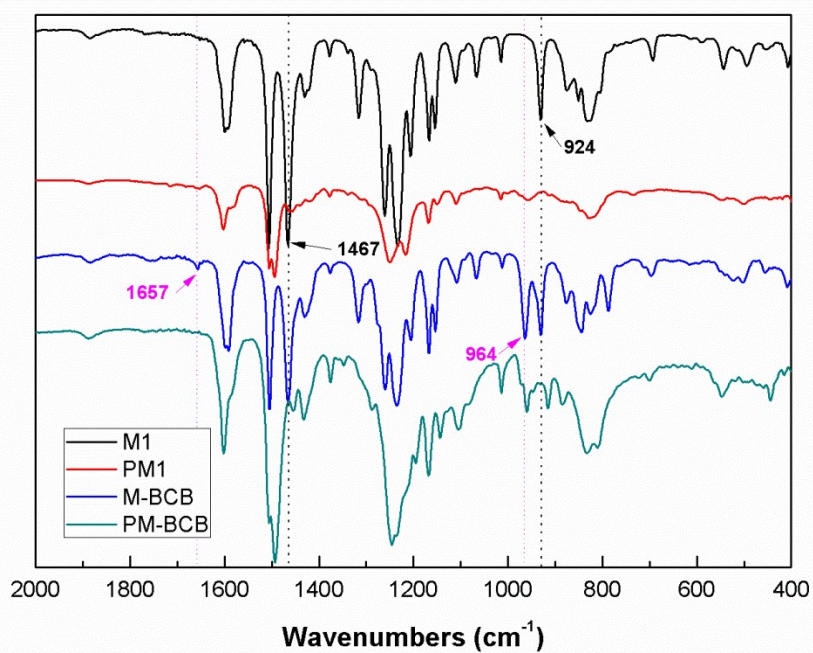

**Fig. S10** Comparison of FT-IR spectra of M1, PM1, M-BCB and PM-BCB

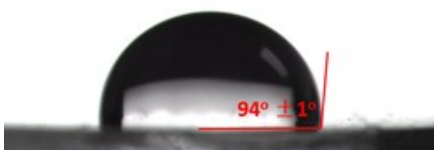

**Fig. S11** Water contact angle of **PM-BCB** sample
